# Supplementary material for: Discrimination of Low-Energy Acetabular Fractures from Controls Using Computed Tomography-Based Bone Characteristics
Source: PubMed Central journal article supplement (PMC7773622; doi:10.1007/s10439-020-02563-4), 2020-07-09

**Supplementary Table 1.** Pearson bivariate correlation coefficients between bone volume fraction (V1), gray level co-occurrence matrix (GLCM) texture (V2 – V10) and gray value (GV) histogram (V11 - V15) variables measured from the acetabular region (AR).

| Variables | V1       | V2       | V3       | V4       | V5       | V6       | V7       | V8       | V9       | V10      | V11      | V12      | V13     | V14      |
|-----------|----------|----------|----------|----------|----------|----------|----------|----------|----------|----------|----------|----------|---------|----------|
| V15       | -0.563** | -0.541** | 0.780**  | -0.172*  | 0.855**  | -0.702** | -0.361** | -0.559** | 0.865**  | -0.136   | -0.597** | -0.367** | 0.897** | -0.367** |
| V14       | -0.232** | 0.729**  | -0.414** | 0.332**  | 0.583**  | 0.641**  | 0.781**  | 0.863**  | 0.338**  | -0.200** | 0.237**  | 0.989**  | -0.104  |          |
| V13       | -0.826** | -0.392** | 0.735**  | -0.031   | -0.749** | -0.563** | -0.145** | -0.350** | 0.810**  | -0.245** | -0.592** | -0.080   |         |          |
| V12       | -0.263** | 0.713**  | -0.409** | 0.343**  | 0.581**  | 0.638**  | 0.770**  | 0.839**  | -0.339** | -0.211** | 0.256**  |          |         |          |
| V11       | 0.356**  | 0.426**  | -0.621** | 0.237**  | 0.689**  | 0.548**  | 0.255**  | 0.504**  | -0.653** | 0.106    |          |          |         |          |
| V10       | 0.273**  | 0.337**  | -0.557** | -0.834** | 0.244**  | 0.437**  | 0.171*   | -0.204** | -0.300** |          |          |          |         |          |
| V9        | -0.536** | -0.589** | 0.885**  | -0.078   | -0.909** | -0.770** | -0.373** | -0.546** |          |          |          |          |         |          |
| V8        | -0.006   | 0.767**  | -0.577** | 0.455**  | 0.768**  | 0.734**  | 0.735**  |          |          |          |          |          |         |          |
| V7        | -0.172*  | 0.940**  | -0.564** | -0.113   | 0.620**  | 0.808**  |          |          |          |          |          |          |         |          |
| V6        | 0.216**  | 0.943**  | -0.932** | -0.140   | 0.923**  |          |          |          |          |          |          |          |         |          |
| V5        | 0.399**  | 0.805**  | -0.935** | 0.125    |          |          |          |          |          |          |          |          |         |          |
| V4        | -0.094   | -0.153*  | 0.181*   |          |          |          |          |          |          |          |          |          |         |          |
| V3        | -0.452** | -0.792** |          |          |          |          |          |          |          |          |          |          |         |          |
| V2        | 0.071    |          |          |          |          |          |          |          |          |          |          |          |         |          |

\* Correlation is significant at the 0.05 level (2-tailed). \*\* Correlation is significant at the 0.01 level (2-tailed)

V1 = Bone volume fraction (BV/TV)

V2 = Contrast

V3 = Homogeneity

V4 = Correlation

V5 = Entropy

V6 = Difference entropy

V7 = Difference variance

V8 = Sum variance

V9 = Maximum probability

V10 = Information measure of correlation

V11 = GV mean

V12 = GV standard deviation

V13 = GV skewness

V14 = GV variance

V15 = GV kurtosis

**Supplementary Table 2.** Pearson bivariate correlation coefficients between bone volume fraction (V1), gray level co-occurrence matrix (GLCM) texture (V2 – V10) and gray value (GV) histogram (V11 - V15) variables measured from the femoral head region FHR-1.

| Variables | V1       | V2       | V3       | V4       | V5       | V6      | V7       | V8       | V9       | V10      | V11      | V12      | V13      | V14      |
|-----------|----------|----------|----------|----------|----------|---------|----------|----------|----------|----------|----------|----------|----------|----------|
| V15       | -0.203** | -0.337** | 0.438**  | -0.423** | -0.350** | 0.238** | -0.670** | -0.663** | 0.372**  | 0.287**  | -0.344** | -0.524** | 0.268**  | -0.514** |
| V14       | 0.107    | 0.624**  | -0.465** | 0.278**  | 0.599**  | 0.599** | 0.677**  | 0.865**  | -0.022   | -0.212** | 0.316**  | 0.991**  | -0.186** |          |
| V13       | -0.914** | -0.087   | 0.072    | -0.184** | -0.083   | -0.068  | -0.083   | -0.250** | -0.187** | 0.135    | -0.695** | -0.177   |          |          |
| V12       | 0.095    | 0.621**  | -0.481** | 0.274**  | 0.604**  | 0.595** | 0.697**  | 0.852**  | -0.051   | -0.209** | 0.326**  |          |          |          |
| V11       | 0.549**  | 0.291**  | -0.311** | 0.185**  | 0.337**  | 0.272** | 0.377**  | 0.456**  | 0.046    | -0.041   |          |          |          |          |
| V10       | -0.139*  | 0.456**  | -0.573** | -0.881** | 0.535**  | 0.427** | 0.172*   | -0.344** | -0.178*  |          |          |          |          |          |
| V9        | 0.167*   | -0.094   | 0.493**  | 0.040    | -0.147*  | 0.071   | -0.531** | 0.012    |          |          |          |          |          |          |
| V8        | 0.158*   | 0.562**  | -0.441** | 0.471**  | 0.568**  | 0.534** | 0.721**  |          |          |          |          |          |          |          |
| V7        | 0.008    | 0.739**  | -0.874** | 0.056    | 0.808**  | 0.628** |          |          |          |          |          |          |          |          |
| V6        | 0.001    | 0.970**  | -0.688** | -0.418** | 0.918**  |         |          |          |          |          |          |          |          |          |
| V5        | 0.012    | 0.955**  | -0.891** | -0.384** |          |         |          |          |          |          |          |          |          |          |
| V4        | 0.135    | -0.410** | 0.363**  |          |          |         |          |          |          |          |          |          |          |          |
| V3        | -0.012   | -0.819** |          |          |          |         |          |          |          |          |          |          |          |          |
| V2        | 0.026    |          |          |          |          |         |          |          |          |          |          |          |          |          |

\* Correlation is significant at the 0.05 level (2-tailed). \*\* Correlation is significant at the 0.01 level (2-tailed)

V1 = Bone volume fraction (BV/TV)

V2 = Contrast

V3 = Homogeneity

V4 = Correlation

V5 = Entropy

V6 = Difference entropy

V7 = Difference variance

V8 = Sum variance

V9 = Maximum probability

V10 = Information measure of correlation

V11 = GV mean

V12 = GV standard deviation

V13 = GV skewness

V14 = GV variance

V15 = GV kurtosis

**Supplementary Table 3.** Pearson bivariate correlation coefficients between bone volume fraction (V1), gray level co-occurrence matrix (GLCM) texture (V2 – V10) and gray value (GV) histogram (V11 - V15) variables measured from the femoral head region FHR-2.

| Variables | V1       | V2       | V3       | V4       | V5       | V6       | V7       | V8       | V9       | V10      | V11      | V12      | V13      | V14      |
|-----------|----------|----------|----------|----------|----------|----------|----------|----------|----------|----------|----------|----------|----------|----------|
| V15       | 0.147*   | 0.572**  | -0.243** | -0.289** | -0.344** | -0.076   | -0.768** | -0.497** | 0.764**  | 0.142*   | 0.120    | -0.411** | 0.266**  | -0.400** |
| V14       | 0.165*   | -0.371** | 0.525**  | 0.247**  | 0.454**  | 0.488**  | 0.539**  | 0.804**  | -0.153*  | -0.242** | 0.128    | 0.988**  | -0.197** |          |
| V13       | -0.908** | -0.194** | -0.045** | -0.208** | -0.005** | -0.150*  | 0.139*   | -0.278** | -0.433** | 0.178*   | -0.676** | -0.197** |          |          |
| V12       | 0.161*   | -0.372** | 0.506**  | 0.266**  | 0.450**  | 0.474**  | 0.552**  | 0.793**  | -0.167*  | -0.251** | 0.134    |          |          |          |
| V11       | 0.569**  | -0.140*  | 0.248**  | 0.092    | 0.312**  | 0.305**  | 0.161*   | 0.365**  | 0.195**  | 0.080    |          |          |          |          |
| V10       | -0.214** | -0.583** | 0.501**  | -0.844** | 0.619**  | 0.466**  | 0.217**  | -0.291** | -0.145*  |          |          |          |          |          |
| V9        | 0.292**  | 0.664**  | -0.190** | -0.029   | -0.333** | -0.005** | -0.752** | -0.165** |          |          |          |          |          |          |
| V8        | 0.244**  | -0.430** | 0.508**  | 0.428**  | 0.517**  | 0.466**  | 0.651**  |          |          |          |          |          |          |          |
| V7        | -0.099   | -0.892** | 0.646**  | 0.032    | 0.774**  | 0.500**  |          |          |          |          |          |          |          |          |
| V6        | 0.075    | -0.597** | 0.957**  | -0.488** | 0.858**  |          |          |          |          |          |          |          |          |          |
| V5        | -0.039   | 0.885**  | 0.917**  | -0.439** |          |          |          |          |          |          |          |          |          |          |
| V4        | 0.221**  | 0.358**  | -0.489** |          |          |          |          |          |          |          |          |          |          |          |
| V3        | -0.006   | -0.762** |          |          |          |          |          |          |          |          |          |          |          |          |
| V2        | 0.174*   |          |          |          |          |          |          |          |          |          |          |          |          |          |

\* Correlation is significant at the 0.05 level (2-tailed). \*\* Correlation is significant at the 0.01 level (2-tailed)

V1 = Bone volume fraction (BV/TV)

V2 = Contrast

V3 = Homogeneity

V4 = Correlation

V5 = Entropy

V6 = Difference entropy

V7 = Difference variance

V8 = Sum variance

V9 = Maximum probability

V10 = Information measure of correlation

V11 = GV mean

V12 = GV standard deviation

V13 = GV skewness

V14 = GV variance

V15 = GV kurtosis

**Supplementary Table 4.** Correlation of trabecular architectural variables between the two femur head regions, FHR-1 and FHR-2, on femurs the side of the acetabular fractures and the corresponding control side femurs. Pearson correlation coefficients (r) and mean statistical test p-values for all subjects and individual genders are also shown.

| Variables                    | Fracture side |         |            |         |             |         | Control side  |         |            |         |             |         |
|------------------------------|---------------|---------|------------|---------|-------------|---------|---------------|---------|------------|---------|-------------|---------|
|                              | All (n = 196) |         | F (n = 44) |         | M (n = 152) |         | All (n = 214) |         | F (n = 50) |         | M (n = 164) |         |
|                              | r             | p       | r          | p       | r           | p       | r             | p       | r          | p       | r           | p       |
| <b>BV/TV</b>                 | 0.404**       | 0.123   | 0.528*     | 0.221   | 0.367*      | 0.239   | 0.577**       | 0.001†  | 0.441*     | 0.103   | 0.566**     | 0.002†  |
| <b>Contrast</b>              | 0.567**       | 0.001†  | 0.671**    | 0.011†  | 0.537**     | 0.010†  | 0.735**       | <0.001† | 0.670**    | 0.002†  | 0.755**     | <0.001† |
| <b>Homogeneity</b>           | 0.563**       | <0.001† | 0.674**    | 0.007†  | 0.523**     | <0.001† | 0.534**       | <0.001† | 0.562**    | <0.001† | 0.531**     | <0.001† |
| <b>Correlation</b>           | 0.611**       | 0.571   | 0.722**    | 0.453   | 0.582**     | 0.799   | 0.537**       | 0.053   | 0.599**    | 0.211   | 0.524**     | 0.115   |
| <b>Entropy</b>               | 0.599**       | 0.004†  | 0.664**    | 0.023†  | 0.579**     | 0.034†  | 0.643**       | <0.001† | 0.661**    | 0.003†  | 0.638**     | <0.001† |
| <b>Difference entropy</b>    | 0.569**       | 0.051   | 0.650**    | 0.044†  | 0.550**     | 0.279   | 0.750**       | 0.001†  | 0.733**    | 0.032†  | 0.765**     | 0.006†  |
| <b>Difference variance</b>   | 0.462**       | <0.001† | 0.598**    | 0.024†  | 0.427**     | 0.001†  | 0.484**       | <0.001† | 0.595**    | 0.009†  | 0.460**     | <0.001† |
| <b>Sum variance</b>          | 0.370**       | <0.001† | 0.545**    | 0.012†  | 0.343**     | 0.006†  | 0.595**       | 0.001†  | 0.539**    | 0.070   | 0.600**     | 0.007†  |
| <b>Maximum probability</b>   | 0.258*        | <0.001† | 0.481*     | 0.013†  | 0.201       | <0.001† | 0.573**       | <0.001† | 0.651**    | 0.017†  | 0.580**     | <0.001† |
| <b>IMC</b>                   | 0.670**       | 0.907   | 0.754**    | 0.725   | 0.645**     | 0.996   | 0.557**       | 0.0013† | 0.640**    | 0.022†  | 0.541**     | 0.008†  |
| <b>GV mean</b>               | 0.856**       | 0.001†  | 0.906**    | 0.274   | 0.837**     | 0.001†  | 0.869**       | <0.001† | 0.923**    | 0.452   | 0.821**     | <0.001† |
| <b>GV standard deviation</b> | 0.620**       | <0.001† | 0.514*     | <0.001† | 0.645**     | <0.001† | 0.679**       | <0.001† | 0.767**    | 0.001†  | 0.660**     | <0.001† |
| <b>GV variance</b>           | 0.587**       | <0.001† | 0.466*     | <0.001† | 0.612**     | <0.001† | 0.686**       | <0.001† | 0.759**    | 0.001†  | 0.674**     | <0.001† |
| <b>GV skewness</b>           | 0.484**       | 0.294   | 0.474*     | 0.675   | 0.470**     | 0.330   | 0.642**       | 0.009†  | 0.646**    | 0.400   | 0.606**     | 0.016†  |
| <b>GV kurtosis</b>           | 0.259**       | 0.000†  | 0.253      | 0.002†  | 0.262*      | <0.001† | 0.236**       | <0.001† | 0.499*     | 0.041†  | 0.220*      | <0.001† |

\* Correlation is significant at the 0.05 level (2-tailed), \*\* Correlation is significant at the 0.01 level (2-tailed)

† Parametric Independent samples t-test ( $p < 0.05$ ), ‡ Nonparametric Mann-Whitney U-test ( $p < 0.05$ ),

BV/TV = Bone volume fraction, IMC = Information measure of correlation, GV = Gray values, SD = Standard deviation

**Supplementary Table 5.** Proximal femur geometry variables neck shaft angle (NSA) and femoral neck axis length (FNALa and FNALb). Values given as means, standard deviations (SD) and 95% confidence interval [CI]. Statistical p-values of the differences for all subjects and individual genders are also shown.

| Variables         | Fracture side                    |                                  |                                  |                                  | Control side                     |                                  |                     |                    | p                  |  |
|-------------------|----------------------------------|----------------------------------|----------------------------------|----------------------------------|----------------------------------|----------------------------------|---------------------|--------------------|--------------------|--|
|                   | All<br>(n = 95)                  | F<br>(n = 20)                    | M<br>(n = 75)                    | All<br>(n = 103)                 | F<br>(n=25)                      | M<br>(n = 78)                    | All<br>(n=198)      | F<br>(n=45)        | M<br>(n = 153)     |  |
| <b>NSA (°)</b>    | 121.71 (5.56)<br>[120.58-122.84] | 118.76 (6.49)<br>[115.72-121.79] | 122.49 (5.05)<br>[121.33-123.66] | 124.60 (5.64)<br>[123.49-125.70] | 124.51 (5.85)<br>[122.09-126.93] | 124.63 (5.61)<br>[123.36-125.89] | <0.001 <sup>‡</sup> | 0.003 <sup>‡</sup> | 0.015 <sup>‡</sup> |  |
| <b>FNALb (mm)</b> | 78.36 (0.36)<br>[77.14-79.58]    | 71.74 (4.05)<br>[70.04-73.83]    | 80.07 (5.24)<br>[78.87-81.28]    | 76.03 (0.03)<br>[74.75-77.30]    | 70.59 (5.04)<br>[68.51-73.83]    | 77.77 (5.98)<br>[76.42-79.12]    | 0.010 <sup>‡</sup>  | 0.615              | 0.037 <sup>‡</sup> |  |
| <b>FNALa (mm)</b> | 103.46 (6.92)<br>[102.06-104.87] | 94.98 (4.34)<br>[92.95-97.01]    | 105.73 (5.59)<br>[104.44-107.01] | 101.22 (8.25)<br>[99.61-102.83]  | 93.37 (6.20)<br>[90.81-95.93]    | 103.74 (7.19)<br>[102.12-105.36] | 0.073               | 0.749              | 0.125              |  |

<sup>‡</sup>Parametric Independent samples t-test ( $p < 0.05$ ). <sup>†</sup>Nonparametric Mann-Whitney U-test ( $p < 0.05$ )

**Supplementary Table 6.** Coefficient weights of the variables used in the final EN model of trabecular architecture features at the acetabular region (AR). The trabecular architecture features were bone volume fraction (BV/TV), gray level co-occurrence matrix and gray value (GV) histogram variables.

| <b>Model inputs</b>        | <b>All subjects</b> | <b>Females</b> | <b>Males</b> |
|----------------------------|---------------------|----------------|--------------|
| <b>Intercept</b>           | 0.000               | 0.002          | -0.002       |
| <b>Correlation</b>         | -                   | -              | 0.257        |
| <b>Difference variance</b> | -                   | 0.343          | -            |
| <b>GV mean</b>             | 0.119               | 0.111          | 0.353        |

**Supplementary Table 7.** Elastic net (EN) regression hyperparameters ( $\alpha$ ,  $\lambda$ ) used in the acetabular region (AR) and femoral head region (FHR) final models for all subjects, females and males. Models with and without proximal femur geometry (PFG) are shown.

| <b>Model</b>     | <b>Without PFG (<math>\alpha</math>, <math>\lambda</math>)</b> | <b>With PFG (<math>\alpha</math>, <math>\lambda</math>)</b> |
|------------------|----------------------------------------------------------------|-------------------------------------------------------------|
| AR               | 0.97, 0.116                                                    | -                                                           |
| AR-female        | 0.94, 0.091                                                    | -                                                           |
| AR-male          | 0.97, 0.056                                                    | -                                                           |
| FHR-1            | 0.01, 0.126                                                    | 0.01, 0.026                                                 |
| FHR-1-female     | 0.94, 0.006                                                    | 0.82, 0.146                                                 |
| FHR-1-male       | 0.1, 0.146                                                     | 0.01, 0.031                                                 |
| FHR-2            | 0.01, 0.141                                                    | 0.97, 0.011                                                 |
| FHR-2-female     | 0.73, 0.056                                                    | 0.01, 0.016                                                 |
| FHR-2-male       | 1.00, 0.036                                                    | 0.97, 0.026                                                 |
| FHR-1&2          | 0.88, 0.026                                                    | 0.91, 0.021                                                 |
| FHR-1&2 - female | 0.94, 0.136                                                    | 0.10, 0.001                                                 |
| FHR-1&2 - male   | 0.91, 0.031                                                    | 0.13, 0.146                                                 |

**Supplementary Figure 1.** Receiver operating characteristics curves of the femur head region 1 (FHR-1) and femur head region 2 (FHR-2). Bayesian logistic regression (BLR) and elastic net (EN) models for all subjects and individual genders. FHR was measured from the fracture side. (A) and (B) show FHR-1 curves without and with PFG, while (C) and (D) show FHR-2 curves without and with PFG.

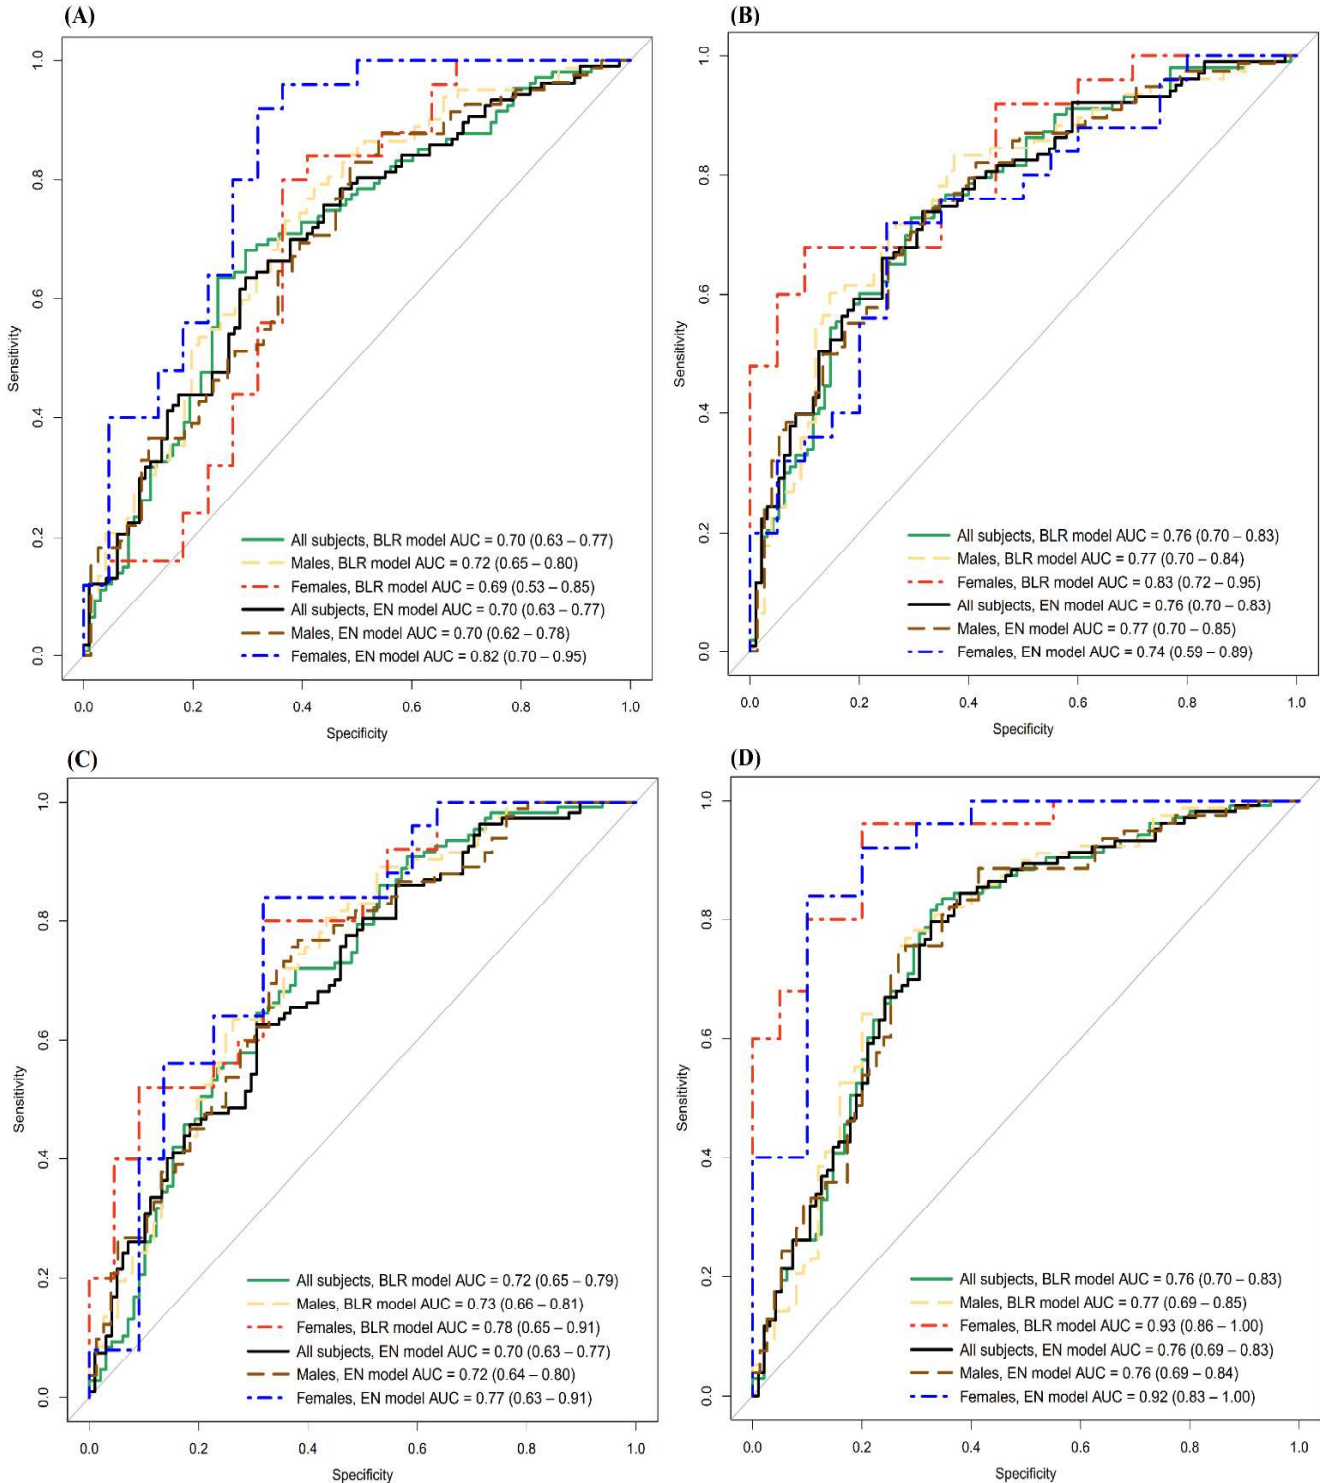

Supplement: 10439_2020_2563_MOESM1_ESM.pdf [file 10439_2020_2563_MOESM1_ESM.pdf]
